# Supplementary material for: Directions in abusive language training data, a systematic review: Garbage in, garbage out
Source: PubMed Central journal article supplement (PMC7769249; doi:10.1371/journal.pone.0243300), 2020-12-28

## Size of training datasets

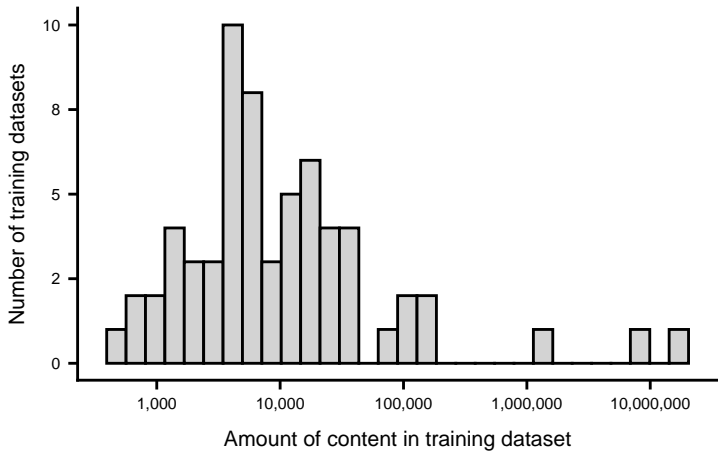

Supplement: pone.0243300.s006.pdf [file pone.0243300.s006.pdf]
