# Supplementary material for: Directions in abusive language training data, a systematic review: Garbage in, garbage out
Source: PubMed Central journal article supplement (PMC7769249; doi:10.1371/journal.pone.0243300), 2020-12-28
Supplement: pone.0243300.s009.pdf [file pone.0243300.s009.pdf]

## **S2 Appendix. Datasets included in survey**

The datasets surveyed in this paper are summarized in Table 2.

| Short Title                                                                       | Year | Language      | Level | Source               | Medium | Task     | Annotation            | Size     | Abuse % | Access to dataset   |
|-----------------------------------------------------------------------------------|------|---------------|-------|----------------------|--------|----------|-----------------------|----------|---------|---------------------|
| Datasets of Slovene and Croatian Moderated News Comments (Slovene)                | 2018 | Slovene       | Posts | MMC RTV website      | Text   | Binary   | Experts, professional | 7600000  | 0.08    | Public (encrypted)  |
| Datasets of Slovene and Croatian Moderated News Comments (Croatian)               | 2018 | Croatian      | Posts | 24sata website       | Text   | Binary   | Experts, professional | 17000000 | 0.02    | Public (encrypted)  |
| Automated Hate Speech Detection and the Problem of Offensive Language             | 2017 | English       | Posts | Twitter              | Text   | Binary   | Crowdsourced          | 24802    | 0.06    | Public              |
| Hate Speech Dataset from a White Supremacy Forum                                  | 2018 | English       | Posts | Stormfront           | Text   | Multiple | Experts, academic     | 9916     | 0.11    | Public              |
| Hateful Symbols or Hateful People?                                                | 2016 | English       | Posts | Twitter              | Text   | Multiple | Experts, academic     | 16914    | 0.32    | Public (dehydrated) |
| A Quality Type-aware Annotated Corpus and Lexicon for Harassment Research         | 2018 | English       | Posts | Twitter              | Text   | Multiple | Experts, academic     | 24189    | 0.13    | Access on request   |
| An Italian Twitter Corpus of and Hate Speech against Immigrants                   | 2018 | Italian       | Posts | Twitter              | Text   | Multiple | Mix                   | 1827     | 0.13    | Public (dehydrated) |
| Measuring the Reliability of Hate Speech Annotations                              | 2017 | German        | Posts | Twitter              | Text   | Binary   | Experts, academic     | 469      | NA      | Public              |
| Detecting Online Hate Speech Using Context Aware Models                           | 2018 | English       | Posts | Fox News             | Text   | Binary   | Experts, academic     | 1528     | 0.28    | Public              |
| Are You a Racist or Am I Seeing Things?                                           | 2016 | English       | Posts | Twitter              | Text   | Multiple | Mix                   | 4033     | 0.16    | Public (dehydrated) |
| Large Scale Crowdsourcing and Characterization of Twitter Abusive Behavior        | 2018 | English       | Posts | Twitter              | Text   | Multiple | Crowdsourced          | 80000    | 0.18    | Public (dehydrated) |
| A Large Labeled Corpus for Online Harassment Research                             | 2017 | English       | Posts | Twitter              | Text   | Binary   | Crowdsourced          | 35000    | 0.16    | Access on request   |
| Creating a WhatsApp Dataset to Study Pre-teen Cyberbullying                       | 2018 | Italian       | Posts | Synthetic / Whatsapp | Text   | Binary   | Synthetic             | 14600    | 0.08    | Public              |
| Aggression-annotated Corpus of Hindi-English Code-mixed Data (Facebook)           | 2018 | Hindi-English | Posts | Facebook             | Text   | Multiple | Experts, academic     | 18000    | 0.06    | Access on request   |
| Aggression-annotated Corpus of Hindi-English Code-mixed Data (Twitter)            | 2018 | Hindi-English | Posts | Twitter              | Text   | Multiple | Experts, academic     | 21000    | 0.27    | Access on request   |
| When Does a Compliment Become Sexist?                                             | 2017 | English       | Posts | Twitter              | Text   | Multiple | Experts, academic     | 712      | 1       | Public (dehydrated) |
| Did You Offend Me? Classification of Offensive Tweets in Hinglish Language        | 2018 | Hindi-English | Posts | Twitter              | Text   | Multiple | Experts, academic     | 3189     | 0.65    | Public              |
| Analysis and Detection of Religious Hate Speech in the Arabic Twittersphere       | 2018 | Arabic        | Posts | Twitter              | Text   | Binary   | Crowdsourced          | 6136     | 0.45    | Public (dehydrated) |
| A Dataset of Hindi-English Code-Mixed Social Media Text for Hate Speech Detection | 2018 | Hindi-English | Posts | Twitter              | Text   | Binary   | Experts, academic     | 4575     | 0.36    | Public (dehydrated) |
| Deep Learning for User Comment Moderation Flagged Comments                        | 2017 | Greek         | Posts | Gazetta              | text   | Binary   | Experts, professional | 1450000  | 0.34    | Public              |
| Deep Learning for User Comment Moderation Moderated Comments                      | 2017 | Greek         | Posts | Gazetta              | text   | Binary   | Experts, academic     | 1500     | 0.22    | Public              |
| Ex Machina: Personal Attacks Seen at Scale                                        | 2017 | English       | Posts | Wikipedia            | Text   | Binary   | Crowdsourced          | 115737   | 0.12    | Public              |
| Ex Machina: Personal Attacks Seen at Scale                                        | 2017 | English       | Posts | Wikipedia            | Text   | Multiple | Crowdsourced          | 10000    | NA      | Public              |
| Toxicity                                                                          | 2017 | English       | Posts | Wikipedia            | Text   | Multiple | Crowdsourced          | 16000    | NA      | Public              |
| Ex Machina: Personal Attacks Seen at Scale                                        | 2017 | English       | Posts | Wikipedia            | Text   | Multiple | Crowdsourced          | 16000    | NA      | Public              |

Table 2. Datasets surveyed (1/3) in this paper.

| Short Title                                                                  | Year | Language   | Level | Source               | Medium | Task     | Annotation        | Size  | Abuse % | Access to dataset   |
|------------------------------------------------------------------------------|------|------------|-------|----------------------|--------|----------|-------------------|-------|---------|---------------------|
| Detecting Offensive Statements Towards Foreigners in Social Media            | 2017 | German     | Posts | Facebook             | Text   | Multiple | Experts, academic | 5836  | 0.11    | Public              |
| Detecting cyberbullying in online communities (World of Warcraft)            | 2016 | English    | Posts | World of Warcraft    | Text   | Binary   | Experts, academic | 16975 | 0.01    | Public              |
| Detecting cyberbullying in online communities (League of Legends)            | 2016 | English    | Posts | League of Legends    | Text   | Binary   | Experts, academic | 17354 | 0.01    | Public              |
| Abusive Language Detection in Indonesian Social Media                        | 2018 | Indonesian | Posts | Twitter              | Text   | Multiple | Crowdsourced      | 2016  | 0.54    | Public              |
| Abusive Language Detection on Arabic Social Media (Twitter)                  | 2017 | Arabic     | Posts | Twitter              | Text   | Multiple | Crowdsourced      | 1100  | 0.59    | Public              |
| Abusive Language Detection on Arabic Social Media (Al Jazeera)               | 2017 | Arabic     | Posts | AlJazeera            | Text   | Multiple | Crowdsourced      | 32000 | 0.81    | Public              |
| A Hierarchically-Labeled Portuguese Hate Speech Dataset                      | 2019 | Portuguese | Posts | Twitter              | Text   | Multiple | Experts, academic | 3059  | 0.32    | Public (dehydrated) |
| Hate Speech Detection in the Indonesian Language                             | 2017 | Indonesian | Posts | Twitter              | Text   | Binary   | Experts, academic | 713   | 0.36    | Public              |
| Anti-Social Behaviour in Online Communication in Arabic                      | 2018 | Arabic     | Posts | YouTube              | Text   | Binary   | Experts, academic | 15050 | 0.39    | Public              |
| L-HSAB: A Levantine Twitter Dataset for Hate Speech and Abusive Language     | 2019 | Arabic     | Posts | Twitter              | Text   | Multiple | Experts, academic | 5846  | 0.38    | Public              |
| Predicting the Type and Target of Offensive Posts in Social Media            | 2019 | English    | Posts | Twitter              | Text   | Multiple | Mix               | 14100 | 0.33    | Access on request   |
| hatEval, SemEval-2019 Task 5 (English)                                       | 2019 | English    | Posts | Twitter              | Text   | Multiple | Mix               | 13000 | 0.4     | Access on request   |
| hatEval, SemEval-2019 Task 5 (Spanish)                                       | 2019 | Spanish    | Posts | Twitter              | Text   | Multiple | Mix               | 6600  | 0.4     | Access on request   |
| GermEval 2018                                                                | 2018 | German     | Posts | Twitter              | Text   | Multiple | Experts, academic | 8541  | 0.34    | Access on request   |
| Multi-Label Hate Speech and Abusive Language Detection in Indonesian Twitter | 2019 | Indonesian | Posts | Twitter              | Text   | Multiple | Crowdsourced      | 13169 | 0.42    | Public              |
| Offensive Comments in the Brazilian Web                                      | 2017 | Portuguese | Posts | g1.globo.com         | Text   | Multiple | Experts, academic | 1250  | 0.33    | Public              |
| Overview of MEX-A3T at IberEval 2018                                         | 2018 | Spanish    | Posts | Twitter              | Text   | Binary   | Experts, academic | 11000 | 0.32    | Access on request   |
| Automatic Misogyny Identification at IberEval 2018 (English)                 | 2018 | English    | Posts | Twitter              | Text   | Multiple | Crowdsourced      | 3977  | 0.47    | Access on request   |
| Automatic Misogyny Identification at IberEval 2018 (Spanish)                 | 2018 | Spanish    | Posts | Twitter              | Text   | Multiple | Crowdsourced      | 4138  | 0.5     | Access on request   |
| IVALITA 2018 Hate Speech Detection Task (Facebook)                           | 2018 | Italian    | Posts | Facebook             | Text   | Multiple | Experts, academic | 4000  | 0.51    | Access on request   |
| IVALITA 2018 Hate Speech Detection Task (Twitter)                            | 2018 | Italian    | Posts | Twitter              | Text   | Multiple | Mix               | 4000  | 0.32    | Access on request   |
| CONAN - COunter Narratives through Nichesourcing (English)                   | 2019 | English    | Posts | Synthetic / Facebook | Text   | Multiple | Synthetic         | 1288  | 1       | Public              |
| CONAN - COunter Narratives through Nichesourcing (French)                    | 2019 | French     | Posts | Synthetic / Facebook | Text   | Multiple | Synthetic         | 1719  | 1       | Public              |
| CONAN - COunter Narratives through Nichesourcing (Italian)                   | 2019 | Italian    | Posts | Synthetic / Facebook | Text   | Multiple | Synthetic         | 1071  | 1       | Public              |
| Characterizing and Detecting Hateful Users on Twitter                        | 2018 | English    | Users | Twitter              | Text   | Binary   | Crowdsourced      | 4972  | 0.11    | Access on request   |
| Learning to Intervene in Online Hate Speech (Gab)                            | 2019 | English    | Posts | Gab                  | Text   | Binary   | Crowdsourced      | 33776 | 0.43    | Public              |
| Learning to Intervene in Online Hate Speech (Reddit)                         | 2019 | English    | Posts | Reddit               | Text   | Binary   | Crowdsourced      | 22324 | 0.24    | Public              |
| Multilingual and Multi-Aspect Hate Speech Analysis (English)                 | 2019 | English    | Posts | Twitter              | Text   | Multiple | Crowdsourced      | 5647  | 0.76    | Public              |

Table 2. Datasets surveyed (2/3) in this paper.

| Short Title                                                    | Year | Language | Level | Source                            | Medium        | Task     | Annotation        | Size   | Abuse % | Access to dataset |
|----------------------------------------------------------------|------|----------|-------|-----------------------------------|---------------|----------|-------------------|--------|---------|-------------------|
| Multilingual and Multi-Aspect Hate Speech Analysis (French)    | 2019 | French   | Posts | Twitter                           | Text          | Multiple | Crowdsourced      | 4014   | 0.72    | Public            |
| Multilingual and Multi-Aspect Hate Speech Analysis (Arabic)    | 2019 | Arabic   | Posts | Twitter                           | Text          | Multiple | Crowdsourced      | 3353   | 0.64    | Public            |
| Exploring Hate Speech Detection in Multimodal Publications     | 2019 | English  | Posts | Twitter                           | Text + Images | Multiple | Crowdsourced      | 149823 | 0.25    | Public            |
| Peer to Peer Hate: Hate Speech Investigators and Their Targets | 2018 | English  | Posts | Twitter                           | Text          | Binary   | Crowdsourced      | 27330  | 0.98    | Public            |
| Offensive Language Identification in Greek                     | 2020 | Greek    | Posts | Twitter                           | Text          | Multiple | Experts, academic | 4779   | 0.29    | Access on request |
| A Corpus of Turkish Offensive Language on Social Media         | 2020 | Turkish  | Posts | Twitter                           | Text          | Multiple | Experts, academic | 36232  | 0.19    | Access on request |
| Offensive Language and Hate Speech Detection for Danish        | 2019 | Danish   | Posts | Twitter, Reddit and news comments | Text          | Multiple | Experts, academic | 3600   | 0.12    | Access on request |
| PolEval 2019 Shared Task 6                                     | 2019 | Polish   | Posts | Twitter                           | Text          | Multiple | Mix               | 10041  | 0.09    | Public            |
| Overview of the HASOC track at FIRE 2019 (English)             | 2019 | English  | Posts | Twitter and Facebook              | Text          | Multiple | Experts, academic | 7005   | 0.36    | Public            |
| Overview of the HASOC track at FIRE 2019 (Hindi)               | 2019 | Hindi    | Posts | Twitter and Facebook              | Text          | Multiple | Experts, academic | 5983   | 0.51    | Public            |
| Overview of the HASOC track at FIRE 2019 (German)              | 2019 | German   | Posts | Twitter and Facebook              | Text          | Multiple | Experts, academic | 4669   | 0.24    | Public            |

**Table 2.** Datasets surveyed (3/3) in this paper.
